# Supplementary material for: Transcriptome analysis of symptomatic and recovered leaves of geminivirus-infected pepper (Capsicum annuum)
Source: PubMed Central journal article supplement (PMC3546870; doi:10.1186/1743-422x-9-295), 2012-11-27

# Recovered tissue

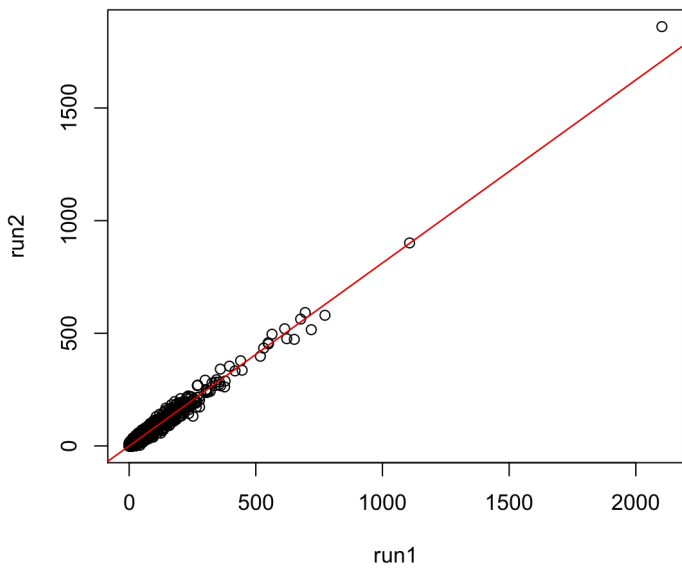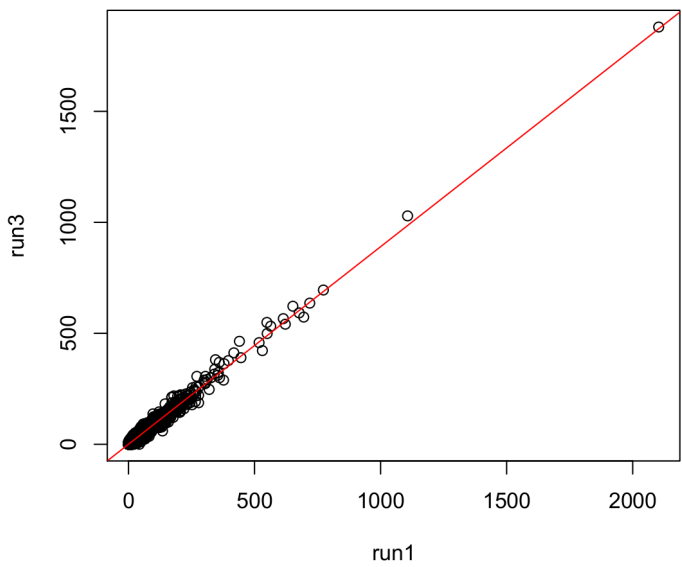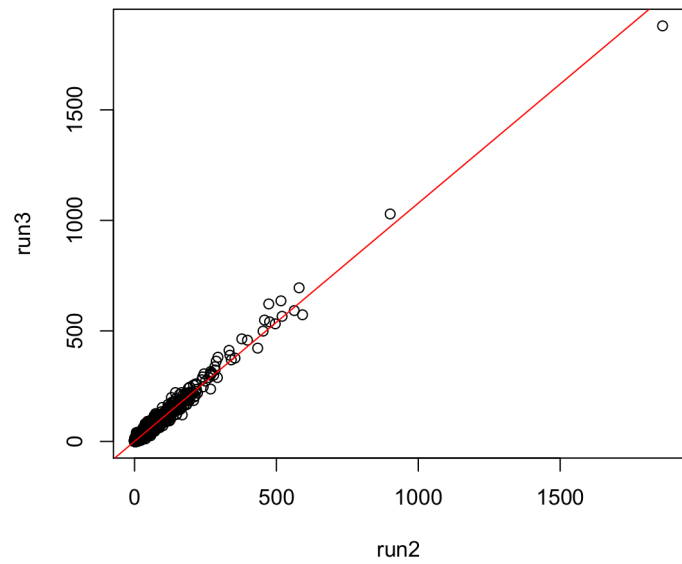

Supplement: 1743-422X-9-295-S1.pdf [file 1743-422X-9-295-S1.pdf]
