# Supplementary material for: Transcriptome analysis of symptomatic and recovered leaves of geminivirus-infected pepper (Capsicum annuum)
Source: PubMed Central journal article supplement (PMC3546870; doi:10.1186/1743-422x-9-295), 2012-11-27
Supplement: 1743-422X-9-295-S4.pdf [file 1743-422X-9-295-S4.pdf]

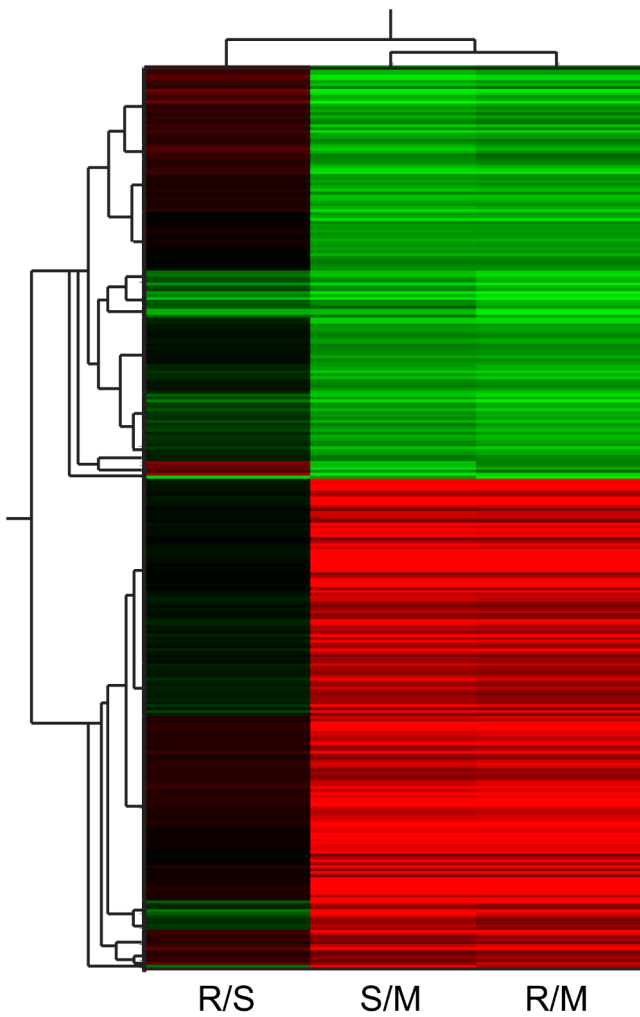

> 5.0

3.0

1.0

0.5

0.0

fold change
